# Supplementary material for: Absorption of SO2 from flue gas by aqueous fulvic acid solution
Source: Royal Society of Chemistry journal article supplement (doi:10.1039/c2ra21536e), 2012-01-01
Supplement: c2ra21536e.pdf [file c2ra21536e.pdf]

## Electronic Supplementary Information

### Absorption of SO<sub>2</sub> from Flue Gas by Aqueous Fulvic Acid Solution

Jitao Yang<sup>1,2</sup>, Guoxin Hu\*<sup>1</sup>

<sup>1</sup> School of Mechanical and Power Engineering, Shanghai Jiaotong University, Shanghai 200240, China

<sup>2</sup> School of Energy and Environment Engineering, Zhongyuan University of Technology, Zhengzhou 450007, China

\* Corresponding author phone/fax: +86-21-34206569; E-mail: hugx@sjtu.edu.cn.

#### Summary:

Page S2: Fig. S1

Page S3: Fig. S2

Page S4: Fig. S3

Page S5: Fig. S4

Page S6: Fig. S5

Page S7: Table S1

Page S8: Table S2

Page S9-S10: References

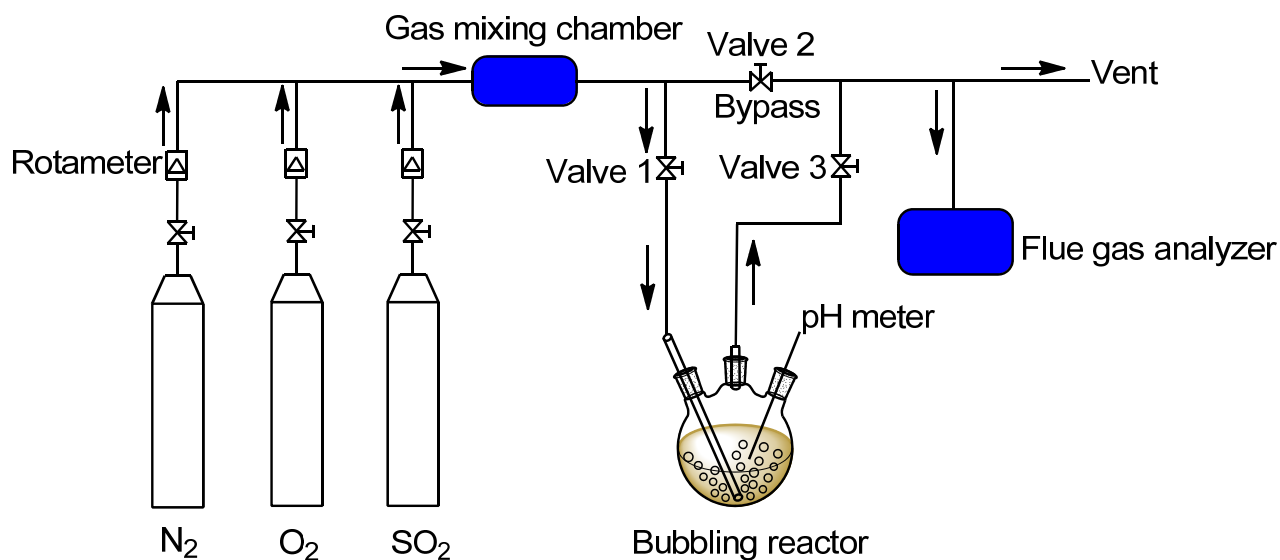

(a)

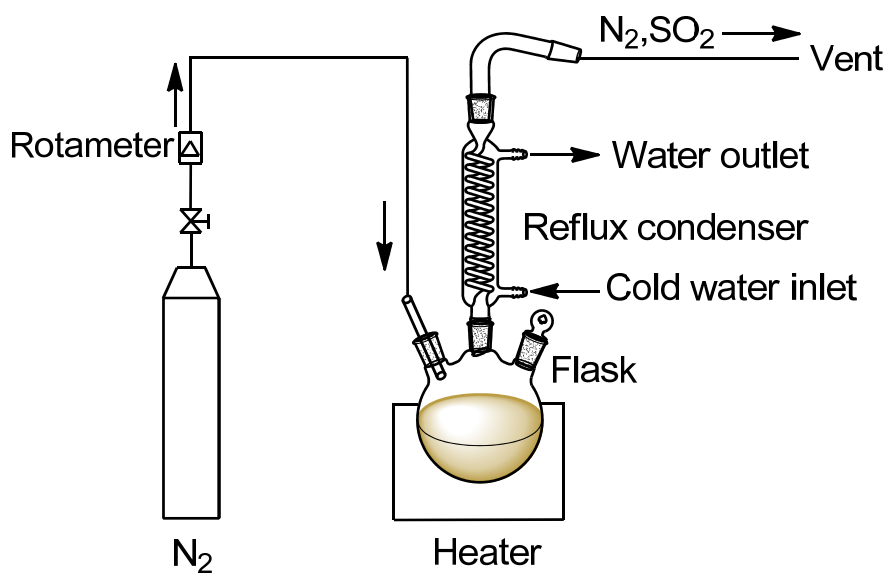

(b)

**Fig. S1** The experimental apparatus of (a) absorption and (b) desorption of SO<sub>2</sub>.

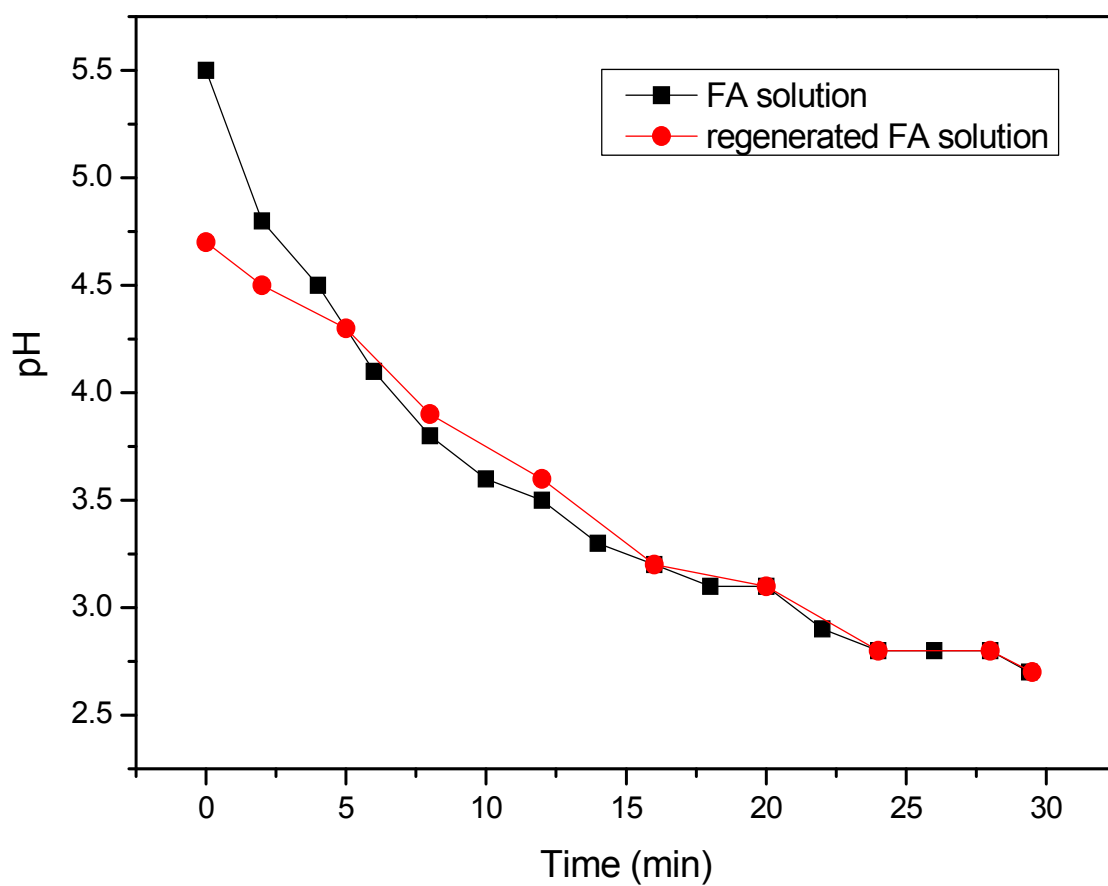

Fig. S2 The pH of the FA solution and regenerated FA solution (Cycle 2) with SO<sub>2</sub> absorption time.

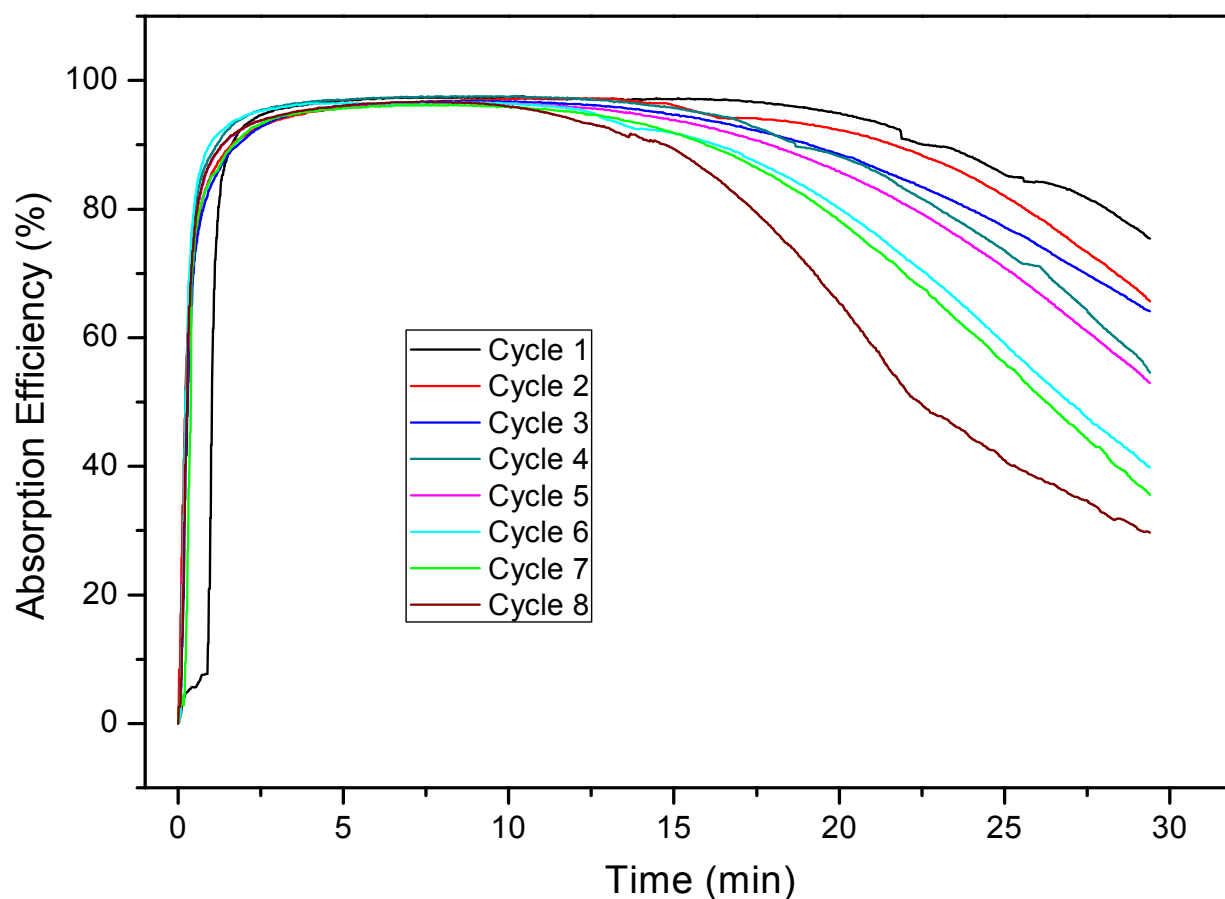

**Fig. S3** SO<sub>2</sub> absorption efficiency with absorption time for Cycle 1-8. Cycle 1 was the FA solution (FA, 0.04 g mL<sup>-1</sup>, 100 ml) without any SO<sub>2</sub> absorption and desorption. Cycle 2 was the first regenerated FA solution, which was obtained by the desorption of the first SO<sub>2</sub>-loaded FA solution, and so on. The SO<sub>2</sub> absorption parameters for Cycle 1-8 were equal (100 ml, 0.04 g mL<sup>-1</sup>, FA solution; gas flow of 0.14 m<sup>3</sup> h<sup>-1</sup>; inlet SO<sub>2</sub> of 2200 ppm; inlet O<sub>2</sub> of 5 vol%; SO<sub>2</sub> absorption time, 29.4 minutes; at 298K and ambient pressure). And the desorption of Cycle 1-8 were carried out in nitrogen gas by heating at 343K under ambient pressure.

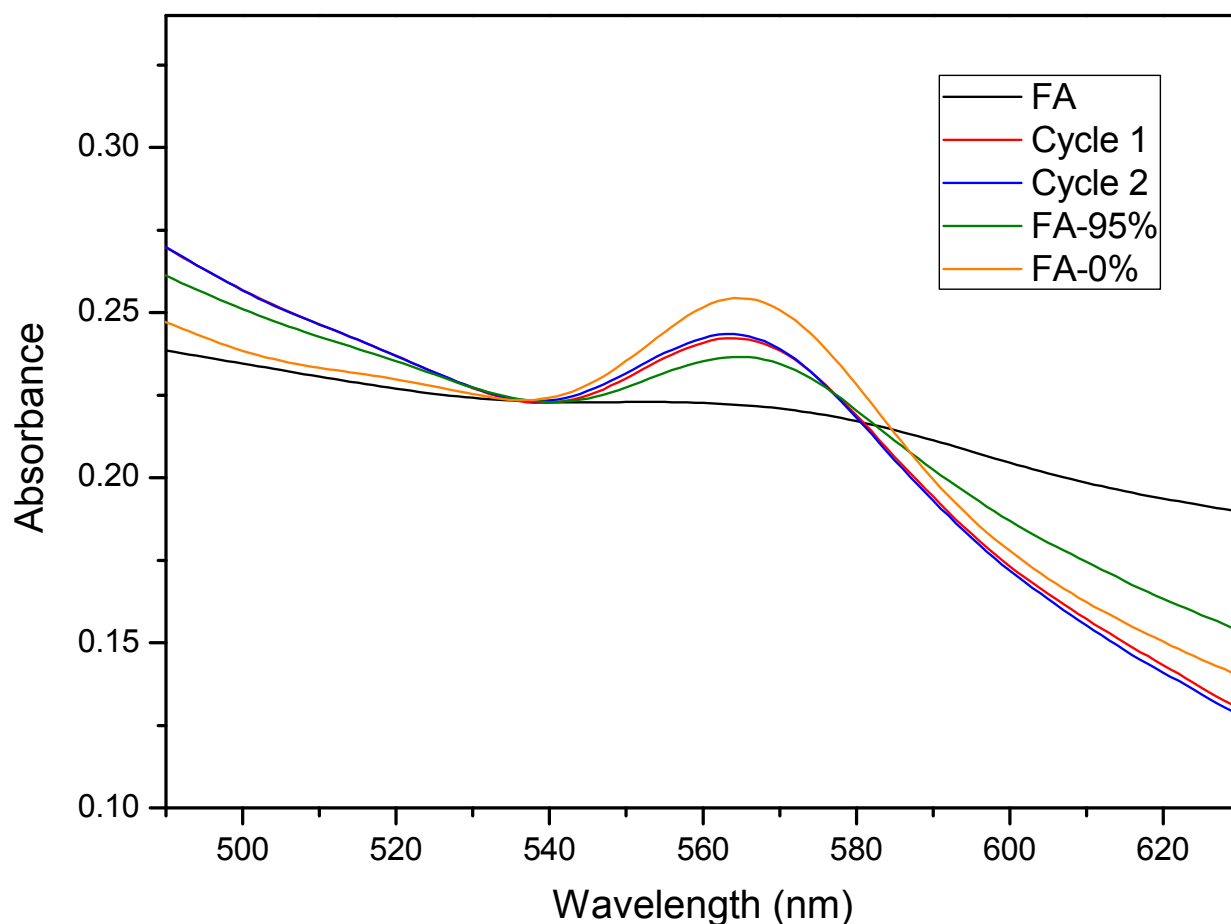

**Fig. S4** The absorption spectra of rhodamine-based fluorescent probe ( $50 \mu\text{mol L}^{-1}$ ) in water-ethanol (90/10, v/v) buffered at pH4.8 upon mixing with FA solution before and after absorbing  $\text{SO}_2$ . FA, Cycle 1, Cycle 2, FA-95% and FA-0% are 100-fold diluted FA solution (FA,  $0.04 \text{ g mL}^{-1}$ ;  $\text{SO}_2$  absorption time, 0 minutes), the  $\text{SO}_2$ -loaded FA solution of Cycle 1 (FA,  $0.04 \text{ g mL}^{-1}$ ;  $\text{SO}_2$  absorption time, 29.4 minutes), the  $\text{SO}_2$ -loaded FA solution of Cycle 2 (FA,  $0.04 \text{ g mL}^{-1}$ ;  $\text{SO}_2$  absorption time, 29.4 minutes), the  $\text{SO}_2$ -loaded FA solution (FA,  $0.04 \text{ g mL}^{-1}$ ;  $\text{SO}_2$  absorption time, 19.8 minutes, when the  $\text{SO}_2$  absorption efficiency was 95%) and the  $\text{SO}_2$ -saturated FA solution (FA,  $0.04 \text{ g mL}^{-1}$ ;  $\text{SO}_2$  absorption time, 180 minutes, when the  $\text{SO}_2$  absorption efficiency was 0%), respectively. For Cycle 1, Cycle 2, FA-95% and FA-0%, the same  $\text{SO}_2$  absorption conditions were gas flow of  $0.14 \text{ m}^3 \text{ h}^{-1}$ , inlet  $\text{SO}_2$  of 2200 ppm, inlet  $\text{O}_2$  of 5 vol%, at 298K and ambient pressure. The ratio of rhodamine-based fluorescent probe solution to each sample was 8 (v/v). Our fluorescent probe was synthesized according to the synthetic route proposed by Yang et al.<sup>1</sup> Ultraviolet absorbances in the wavelength range of 400-680nm were determined using a UV-visible spectrophotometer (EV300, Thermo Electron, USA).

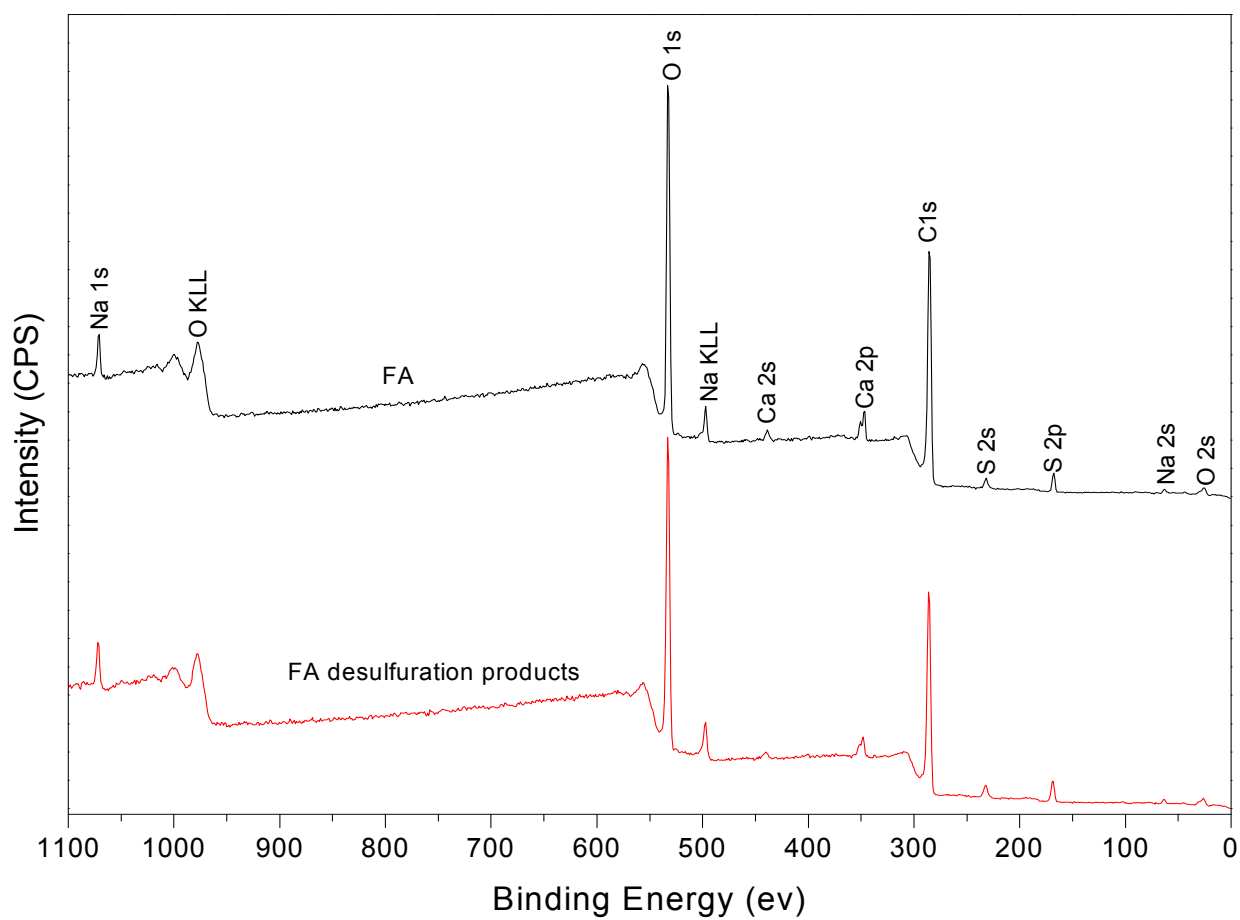

**Fig. S5** XPS survey spectra of FA and FA desulfuration products.

**Table S1 Assignment of FTIR Absorption Bands of FA**

| <b>Wavenumber<br/>(cm<sup>-1</sup>)</b> | <b>Assignment</b>                                                                       | <b>Reference</b> |
|-----------------------------------------|-----------------------------------------------------------------------------------------|------------------|
| 3405                                    | O–H stretching (phenols, alcohols and carboxyls), N–H stretching (amides and amines)    | 2                |
| 2940                                    | aliphatic C–H stretching                                                                | 2a-c             |
| 2844                                    | aliphatic C–H stretching                                                                | 2a-c             |
| 1705                                    | carboxylic C=O stretching                                                               | 2a-c, 3          |
| 1600                                    | aromatic C=C, asymmetric C=O stretching of COO <sup>-</sup>                             | 2a, 2b, 3        |
| 1517                                    | C=C stretching of aromatic rings                                                        | 4                |
| 1460                                    | C–H stretching of CH <sub>2</sub> and CH <sub>3</sub> groups of aliphatic chains        | 2a, 2d, 4-5      |
| 1426                                    | symmetrical C=O stretching of COO <sup>-</sup> , aliphatic C–H bendings                 | 6                |
| 1330                                    | Syringyl ring with C–O stretching                                                       | 4, 7             |
| 1219                                    | C–O stretching and O–H deformation of COOH                                              | 2a, 8            |
| 1118                                    | SO <sub>4</sub> asymmetric stretching, aromatic C–H in plane deformation (syringyl)     | 7, 9             |
| 1043                                    | Alcoholic and polysaccharide CO stretch and OH deformation, sulfonic acids              | 8b, 10           |
| 916, 830                                | out-of-plane deformation vibrations of aromatic C–H                                     | 6a, 7, 9d, 11    |
| 654                                     | S–O stretching of sulphonic groups                                                      | 9c, 12           |
| 603                                     | asymmetric stretching and deformation vibrations of SO <sub>4</sub> <sup>2-</sup> anion | 9c, 13           |
| 532                                     | Stretching of C–C                                                                       | 11               |

**Table S2 Surface Composition Determined by XPS Quantification**

| Sample                          | Peak  | Position BE (eV) | Atomic Concentration (%) <sup>a</sup> |
|---------------------------------|-------|------------------|---------------------------------------|
| FA                              | S 2p  | 167.9            | 2.0                                   |
|                                 | C 1s  | 286.3            | 61.7                                  |
|                                 | Ca 2p | 347.5            | 1.5                                   |
|                                 | N 1s  | 399.7            | 0.3                                   |
|                                 | O 1s  | 532.9            | 33.0                                  |
|                                 | Na 1s | 1071.7           | 1.6                                   |
|                                 | S 2p  | 169              | 2.6                                   |
| FA<br>desulfuration<br>products | C 1s  | 286.2            | 57.6                                  |
|                                 | Ca 2p | 348.3            | 1.2                                   |
|                                 | N 1s  | 400.8            | 0.3                                   |
|                                 | O 1s  | 533.2            | 36.3                                  |
|                                 | Na 1s | 1071.8           | 2.0                                   |

<sup>a</sup> Hydrogen and Magnesium were not detected. Quantitation was performed by using peak areas, which were divided by atomic sensitivity factors to evaluate atomic concentrations of each elements.



## References

- 1 X.-F. Yang, M. Zhao and G. Wang, *Sens. Actuators B: Chem.*, 2011, **152**, 8-13.
- 2 (a) F. J. Stevenson and K. M. Goh, *Geochim. Cosmochim. Acta* 1971, **35**, 471-483; (b) F. J. Stevenson, ed., *Humus chemistry: genesis, composition, reactions (2nd ed.)*, John Wiley and Sons, New York, 1994; (c) G. Ait Baddi, M. Hafidi, J. Cegarra, J. A. Albuquerque, J. González, V. Gilard and J.-C. Revel, *Bioresour. Technol.* , 2004, **93**, 285-290; (d) R. Abouelwafa, S. Amir, S. Souabi, P. Winterton, V. Ndira, J.-C. Revel and M. Hafidi, *Bioresour. Technol.* , 2008, **99**, 6112-6118.
- 3 (a) T. H. Yoon, S. B. Johnson and G. E. Brown, *Langmuir*, 2005, **21**, 5002-5012; (b) H. Fu and X. Quan, *Chemosphere*, 2006, **63**, 403-410.
- 4 S. I. M. Carvalho, M. Otero, A. C. Duarte and E. B. H. Santos, *Chemosphere*, 2008, **73**, 1845-1852.
- 5 A. Piccolo, P. Zaccheo and P. G. Genevini, *Bioresour. Technol.* , 1992, **40**, 275-282.
- 6 (a) X. Liu and D. K. Ryan, *Environ. Technol.* , 1997, **18**, 417-423; (b) O. Francioso, S. Sanchez-Cortes, V. Tugnoli, C. Ciavatta and C. Gessa, *Appl. Spectrosc.* , 1998, **52**, 270-277.
- 7 A. García, I. Egües, A. Toledano, M. González, L. Serrano and J. Labidi, *Chem. Eng. Trans.*, 2009, **18**, 911-916.
- 8 (a) A. Piccolo and F. J. Stevenson, *Geoderma*, 1982, **27**, 195-208; (b) N. Senesi, T. M. Miano, M. R. Provenzano and G. Brunetti, *Sci. Total Environ.* , 1989, **81-82**, 143-156; (c) J. I. Kim, G. Buckau, G. H. Li, H. Duschner and N. Psarros, *Fresenius J. Anal. Chem.*, 1990, **338**, 245-252.
- 9 (a) M. M. Thompson and R. A. Palmer, *Appl. Spectrosc.* , 1988, **42**, 945-951; (b) T. Ishizuka, H. Kabashima, T. Yamaguchi, K. Tanabe and H. Hattori, *Environ. Sci. Technol.*, 2000, **34**, 2799-2803; (c) S. M. Doncea, R. M. Ion, R. C. Fierascui, E. Bacalum, A. A. Bunaciu and H. Y. Aboul-Enein, *Instrum. Sci. Technol.*, 2009, **38**, 96-106; (d) M. N. Mohamad Ibrahim, N. Zakaria, C. S. Sipaut, O. Sulaiman and R. Hashim, *Carbohydr. Polym.* , 2011, **86**, 112-119.

- 10 (a) L. B. Barber, J. A. Leenheer, T. I. Noyes and E. A. Stiles, *Environ. Sci. Technol.*, 2001, **35**, 4805-4816; (b) J. A. Leenheer, R. L. Wershaw, G. K. Brown and M. M. Reddy, *Appl. Geochem.*, 2003, **18**, 471-482.
- 11 G. Hu, Z. Sun and H. Gao, *Environ. Sci. Technol.*, 2010, **44**, 6712-6717.
- 12 E. B. H. Santos and A. C. Duarte, *Water Res.*, 1998, **32**, 597-608.
- 13 (a) R. S. Jayasree, V. P. Mahadevan Pillai, V. U. Nayar, I. Odnevall and G. Keresztury, *Mater. Chem. Phys.*, 2006, **99**, 474-478; (b) J. Lian, X. Sun and X. Li, *Mater. Chem. Phys.*, 2011, **125**, 479-484.
